# Supplementary material for: The impact of obesity on static and proactive balance and gait patterns in sarcopenic older adults: an analytical cross-sectional investigation
Source: PeerJ. 2023 Nov 23;11:e16428. doi: 10.7717/peerj.16428 (PMC10676719; doi:10.7717/peerj.16428)
Supplement: Supplemental Information 1 [file peerj-11-16428-s001.xlsx]

## Sheet: Feuil1
ROMBERG TEST (s)		FRT		TUG		Gait speed		Step length		Stride length		Support phase		1double support		Single support		2nd double support		Swing Phase
GC	SO	GC	SO	GC	SO	GC	SO	GC	SO	GC	SO	GC	SO	GC	SO	GC	SO	GC	SO	GC	SO
8.2	5.3	8.2	5.3	10.2	14.7	0.94	0.6	33.2	24.7	66.4	49.4	68.6	75.2	31.1	28.1	26.5	25.7	11	21.4	31.4	24.8
11.5	13.4	11.5	10.8	13.6	12.4	0.95	0.9	35.1	23.2	70.2	46.4	67.4	73.8	21.4	27.4	28.4	23.9	17.6	22.5	32.6	26.2
9.5	7.8	7.8	9.4	10.1	12.3	0.95	0.69	35.8	24	71.6	48	70.1	76.1	21.7	26.1	25.3	21.8	23.1	28.2	29.9	23.9
9.3	5.6	9.3	9.1	12.5	14.5	0.89	0.62	34.4	24.8	68.8	49.6	66.8	74.6	19.9	25.8	25.7	23.3	21.2	25.5	33.2	25.4
5.9	8.4	12.5	11.2	10.1	11.2	0.81	0.78	31.7	23.1	63.4	46.2	67.1	73.9	23	25.9	27.3	22.8	16.8	25.2	32.9	26.1
13.8	7.9	5.9	6.7	12.3	14.4	0.75	0.66	35.6	26.2	71.2	52.4	68.7	74.6	22.3	27	26.6	24.4	19.8	23.2	31.3	25.4
15	6.7	13.8	6.2	13.4	14.2	0.9	0.65	32.5	22.8	65	45.6	69.5	75.7	19.7	26.4	27.9	25.4	21.9	23.9	30.5	24.3
13	6.2	12	9.7	11.1	13.7	1	0.69	30.3	24.5	60.6	49	67.9	71.2	20.2	23.9	26.4	22.1	21.3	25.2	32.1	28.8
11.1	10.5	11.1	11.2	9.9	10.9	0.94	0.75	34.2	25.4	68.4	50.8	69.7	75.5	22.8	29.4	26.9	25.1	20	21	30.3	24.5
9.5	10.3	6.5	11.2	13.9	11.3	1.1	0.74	34.5	23.6	69	47.2	67.9	74.4	19.8	25.7	27.1	23.6	21	25.1	32.1	25.6
13.7	8.9	13.7	8.9	12.9	13.7	1.2	0.74	34.7	24.9	69.4	49.8	70.3	75.1	23.6	26.9	26.8	22.9	19.9	25.3	29.7	24.9
10.9	9.4	10.9	8.4	10.7	12.4	0.85	0.74	33.7	25.3	67.4	50.6	69.5	74.9	22.5	27.8	25.9	24.2	21.1	22.9	30.5	25.1
12.4	9.1	11.4	7.9	12.8	13.7	1.1	0.57	36.2	24.2	72.4	48.4	68	74.7	20.9	26.5	27.2	23.5	19.9	24.7	32	25.3
14.2	6.8	14.2	5.4	10.3	14.7	0.99	0.49	31.8	22.7	63.6	45.4	68.4	74.7	20.7	26.7	26.3	24.1	21.4	23.9	31.6	25.3
8.8	7.4	8.8	7.3	9.8	13.7	1	0.6	32.5	24.3	65	48.6	70.7	75.2	23.4	24.8	25.6	22.7	21.7	27.7	29.3	24.8
10.5	7.3	10.1	6.7	9.8	13.9	1	0.59	35.9	23.8	71.8	47.6	66.5	73.5	20.1	26.3	27.6	24.8	18.8	22.4	33.5	26.5
9.7	9.5	6.9	12.8	12.9	10.7	0.8	0.9	33.6	22.9	67.2	45.8	69.8	74.8	24.1	27.2	26.1	23.2	19.6	24.4	30.2	25.2
11.3	12.3	9.7	10.5	12.6	11.4	1	0.69	36.4	25	72.8	50	67.6	76	20.6	25.1	28.1	25.3	18.9	25.6	32.4	24
7.6	13.2	11.3	10.3	13.4	12.9	0.75	0.85	36.1	25.1	72.2	50.2	69.1	74.2	22.4	27.5	25.8	23.7	20.9	23	30.9	25.8
12.5	8.8	7.6	5.9	8.1	12.4	0.63	0.74	30.9	23.4	61.8	46.8	70	75.3	21.2	24.7	26.7	22.4	22.1	28.2	30	24.7
13.2		12.5		11.9		0.74		33.2		66.4		68.6		31.1		26.5		11		31.4
12.9		11.2		13.1		0.69		35.1		70.2		67.4		21.4		28.4		17.6		32.6

## Sheet: Feuil2
Age		body height		body mass		BMI		body fat		FBM		LBM		handgrip force
GC	SO	GC	SO	GC	SO	GC	SO	GC	SO	GC	SO	GC	SO	GC	SO
83.4	79.3	160.1	159.5	63.6	96.8	24.8127	38.0499	20.1	45.6	12.7836	44.1408	50.8164	52.6592	12.6	14.1
77.2	74.2	175.7	171.2	74	89.5	23.9711	30.5362	14.9	24.3	11.026	21.7485	62.974	67.7515	9.5	8.4
85.3	80.5	161.5	160.4	65.4	93.9	25.0745	36.497	19.3	40	12.6222	37.56	52.7778	56.34	18.4	15.8
78.6	76.6	158.4	157.1	61.5	92.7	24.5112	37.5602	15.4	41.3	9.471	38.2851	52.029	54.4149	8.2	9.2
79.8	75.8	172.3	166.3	74	91.3	24.9265	33.0131	16.9	32.7	12.506	29.8551	61.494	61.4449	15.3	13.3
81.4	77.4	157.3	152.6	62.5	96.2	25.2594	41.311	18.5	41.9	11.5625	40.3078	50.9375	55.8922	7.7	6.7
82.2	78.2	177.2	173.5	75.9	94.3	24.1721	31.3266	15	40.5	11.385	38.1915	64.515	56.1085	20.8	18.8
86.1	81.1	159.4	158.4	66.3	85.9	26.0938	34.236	20.2	34.7	13.3926	29.8073	52.9074	56.0927	10.4	11.4
75.3	72.8	163.3	162.3	67.4	88.8	25.2748	33.7113	14.3	28.8	9.6382	25.5744	57.7618	63.2256	6.5	7.5
88	83	168.7	163.7	70.6	85.4	24.807	31.8684	17.6	28.3	12.4256	24.1682	58.1744	61.2318	19.3	16.3
76	74.5	156.9	155.9	64.7	93	26.282	38.264	19.8	38.4	12.8106	35.712	51.8894	57.288	5.2	5.2
83.5	79.8	171.2	165.2	69.4	85	23.6784	31.1458	16.1	30.1	11.1734	25.585	58.2266	59.415	17.7	14.7
78.3	76.3	173	167	72.5	94.1	24.224	33.7409	17.5	37.2	12.6875	35.0052	59.8125	59.0948	13	12
80.7	77.7	155.8	154.8	60.4	95.4	24.883	39.8113	18.4	44	11.1136	41.976	49.2864	53.424	11.9	10.9
85.9	80.9	176.6	170.6	79	93.6	25.3306	32.1601	19.8	38.5	15.642	36.036	63.358	57.564	16.6	15.6
74.9	73.4	157.7	156.7	63.2	90.7	25.4129	36.9377	17.9	36	11.3128	32.652	51.8872	58.048	10.6	9.6
82.3	78.6	176.9	172.9	78	90	24.9252	30.106	15.7	24.8	12.246	22.32	65.754	67.68	7.8	7.8
78.5	75	174.5	168.5	75.9	92.3	24.9259	32.5089	18.2	34	13.8138	31.382	62.0862	60.918	12.5	11.5
79.1	76.9	162.6	161.6	67.7	86.5	25.6063	33.1233	20.9	28	14.1493	24.22	53.5507	62.28	15.4	14.4
87.2	82.2	160.2	159.2	64.3	84.2	25.0545	33.222	19.3	30.9	12.4099	26.0178	51.8901	58.1822	11.1	10.1
76.4		168.4		69.2		24.4018		15.5		10.726		58.474		14.5
84.7		164.9		66.8		24.566		18.6		12.4248		54.3752		13.3
